# Supplementary material
Source: PubMed Central journal article supplement (PMC7127381)

Measurements of ozone metrics (ppb)

O3, 1h max

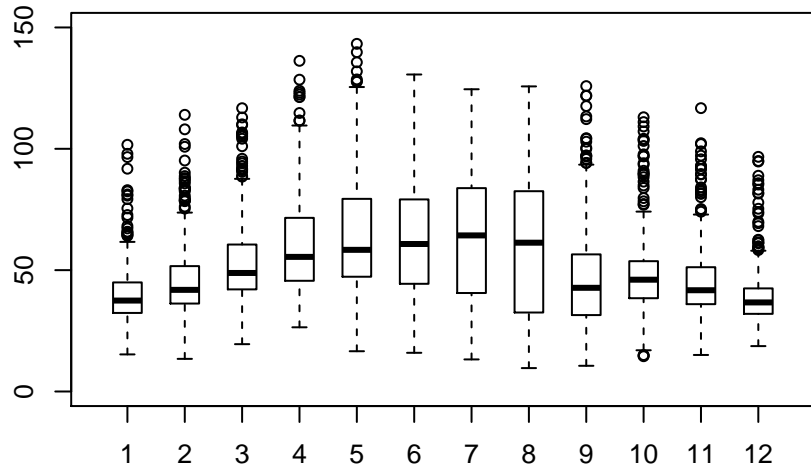

O3, 8h max

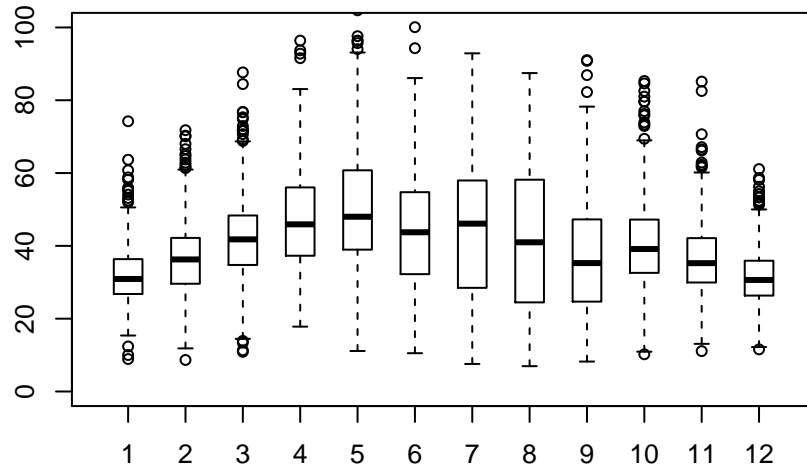

O3, 24h avg

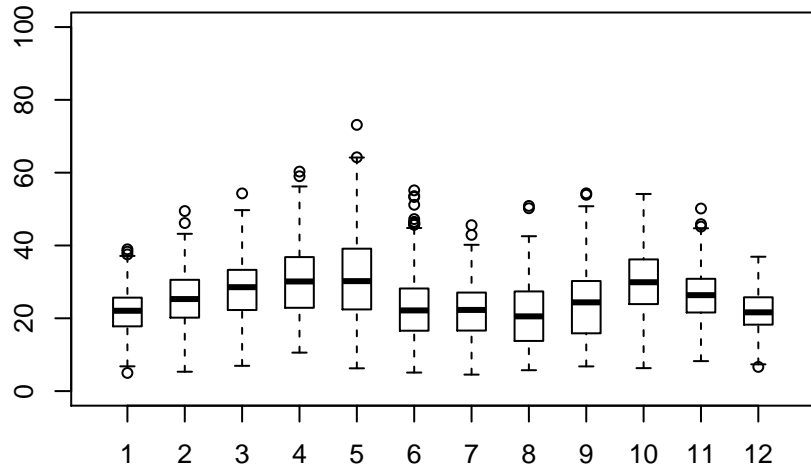

OX

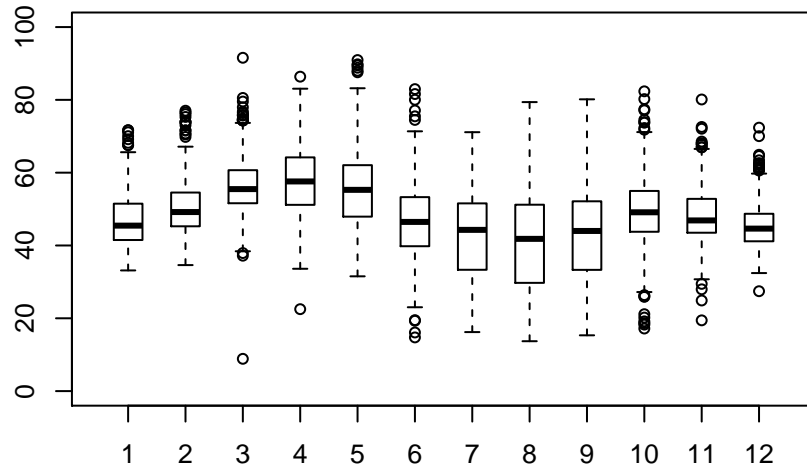

Calendar month

Supplement: mmc1.pdf [file mmc1.pdf]

O3, 1h max

O3, 8h max

O3, 24h avg

Ox

Hot season

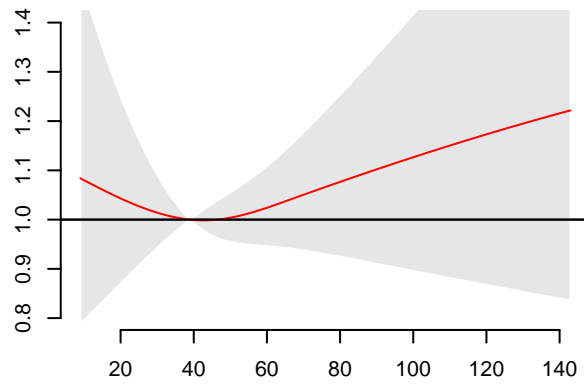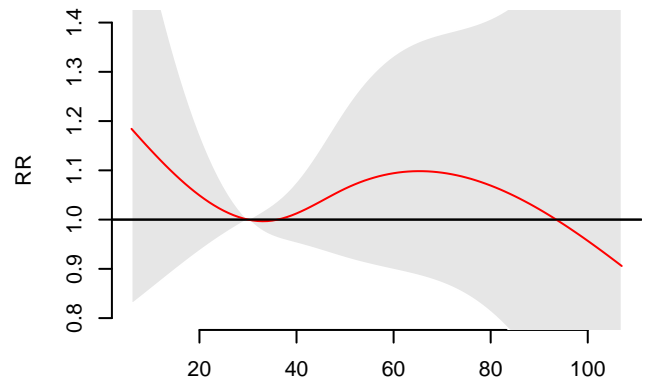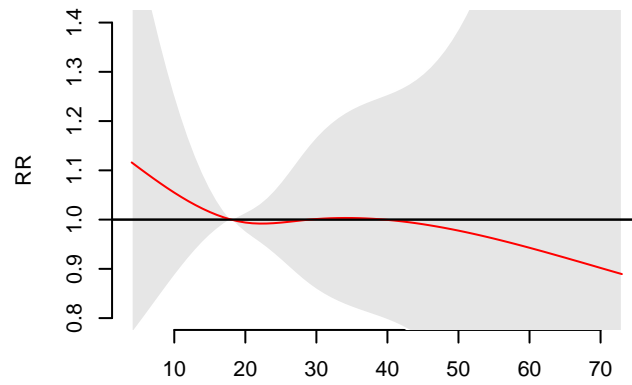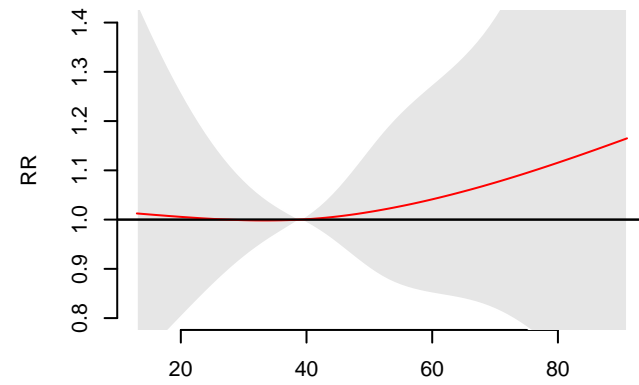

Cold season

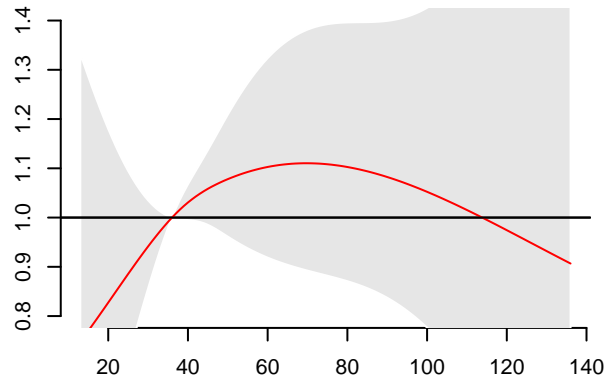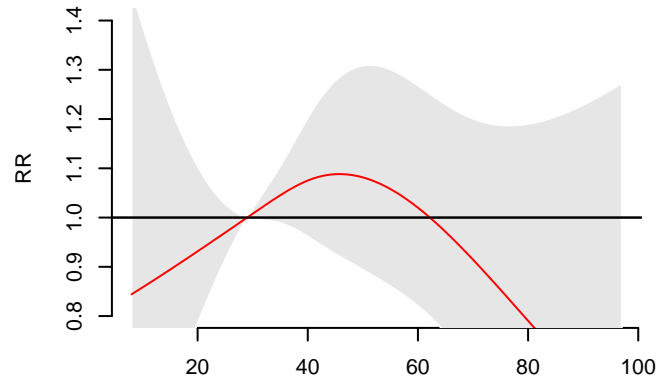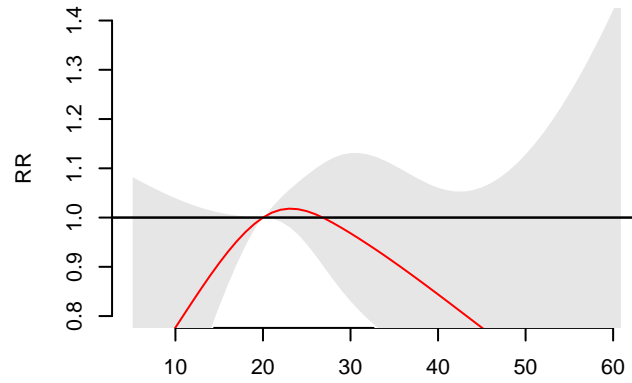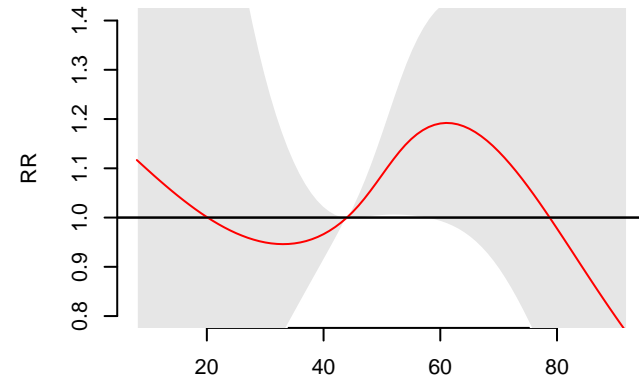

Entire year

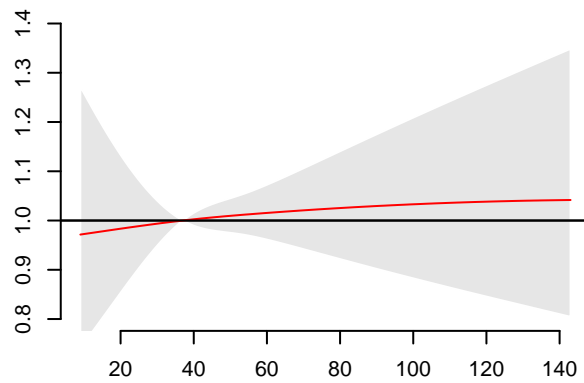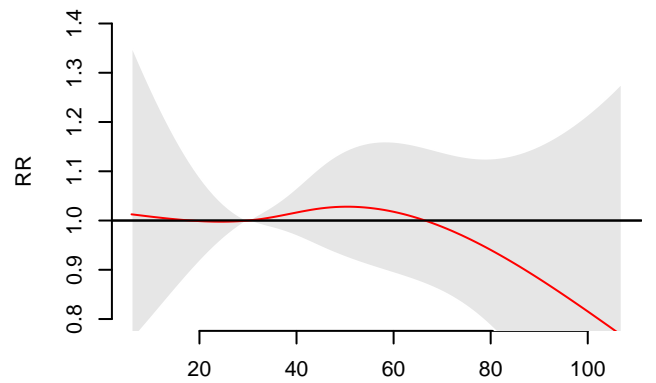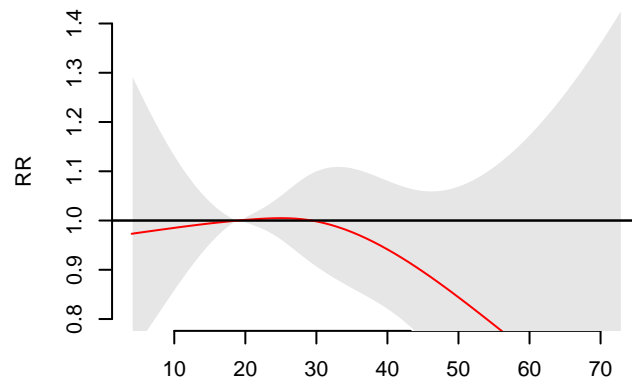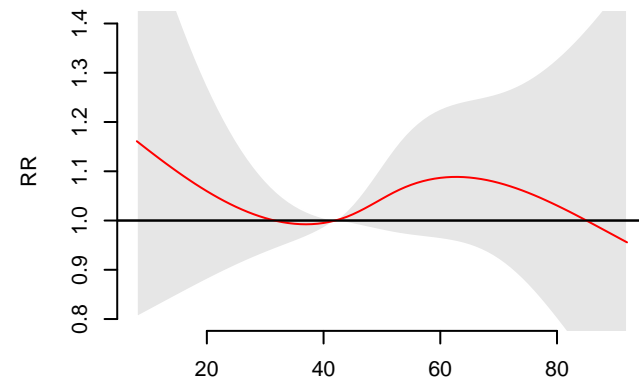

Measurements of ozone metrics

Supplement: mmc2.pdf [file mmc2.pdf]

O3, 1h max

O3, 8h max

O3, 24h avg

Ox

Hot season

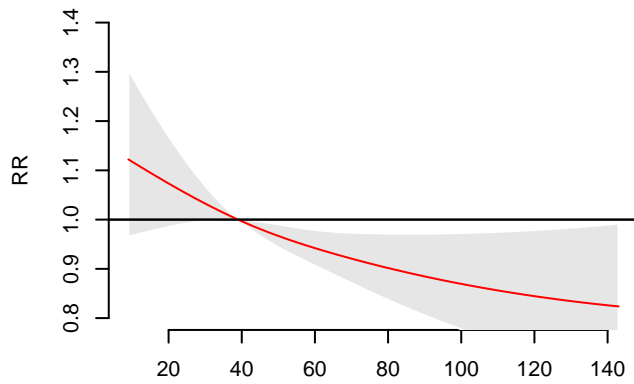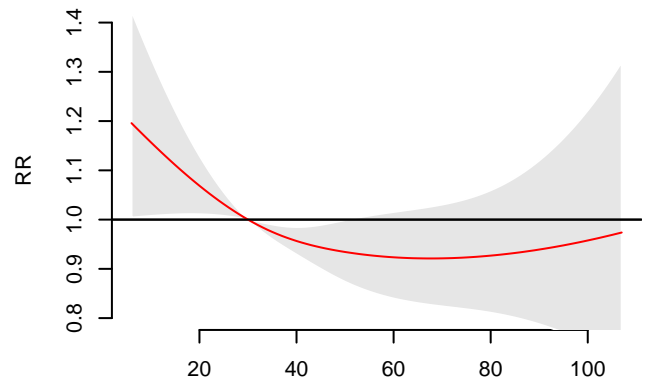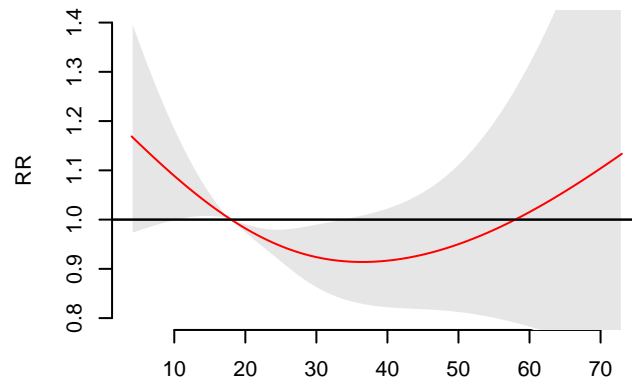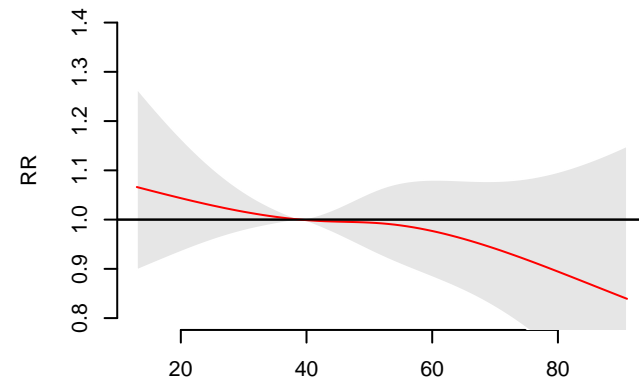

Cold season

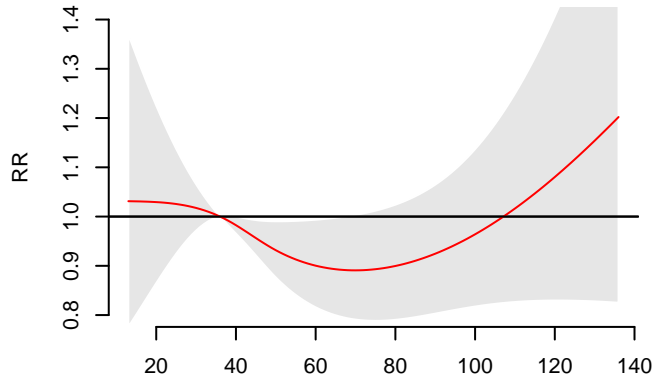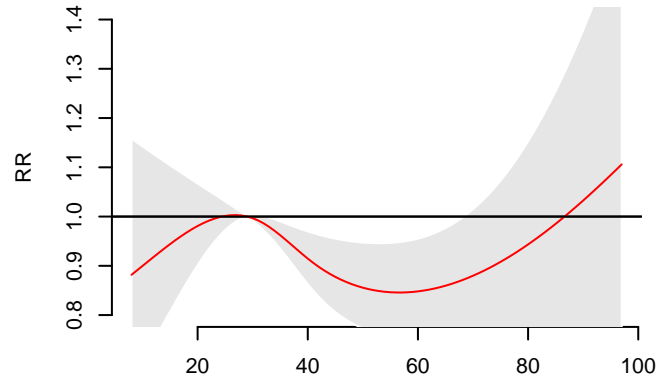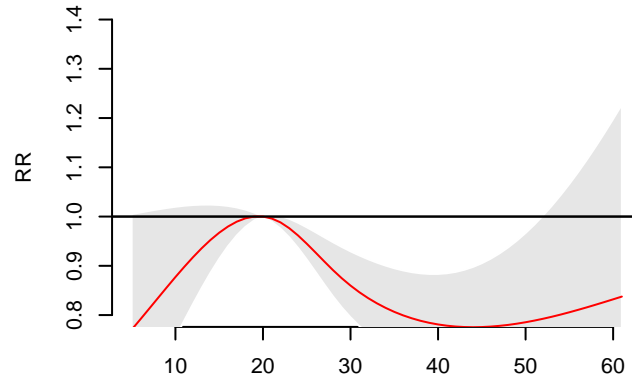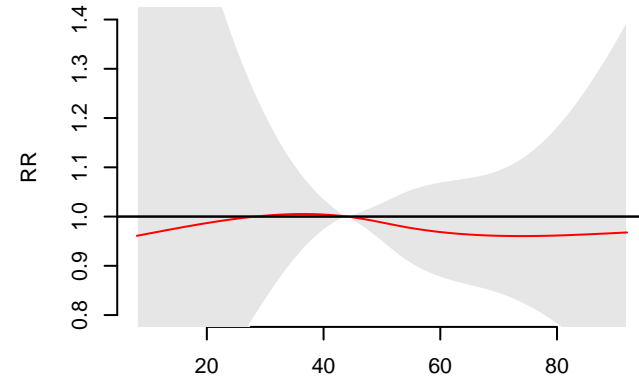

Entire year

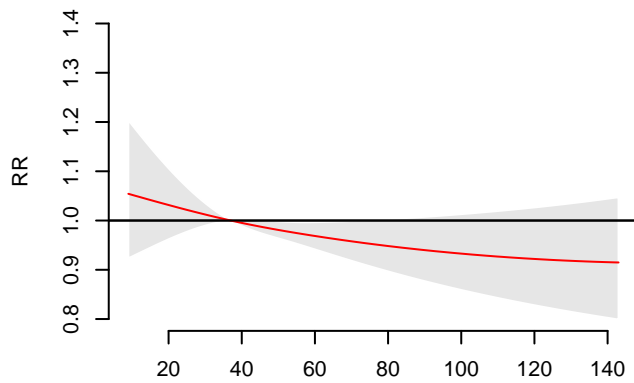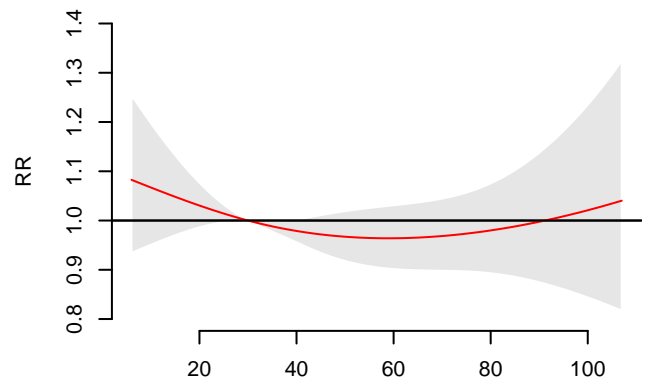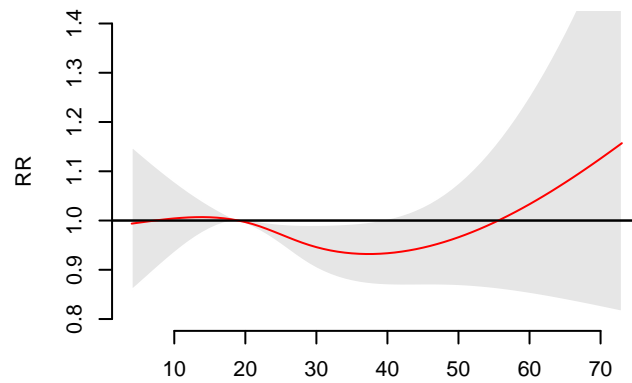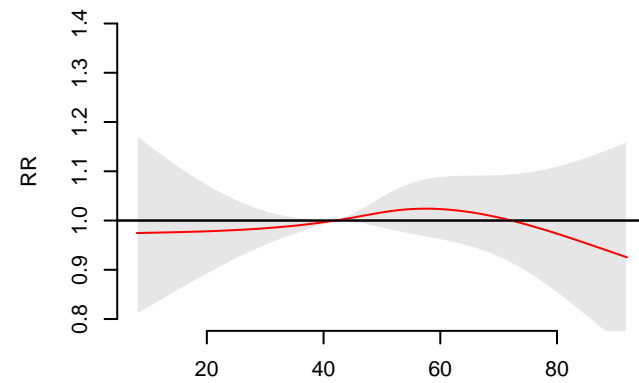

Measurements of ozone metrics

Supplement: mmc3.pdf [file mmc3.pdf]

O3, 1h max

O3, 8h max

O3, 24h avg

Ox

Hot season

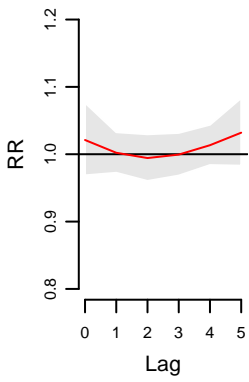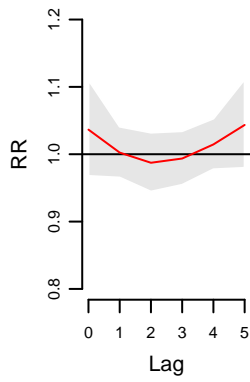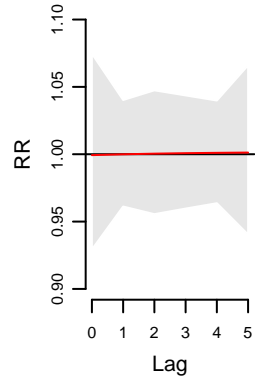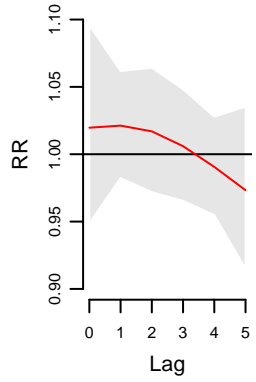

Cold season

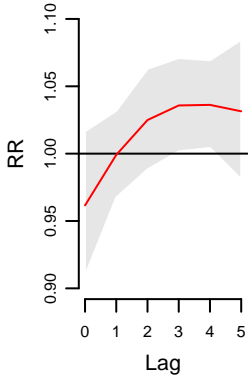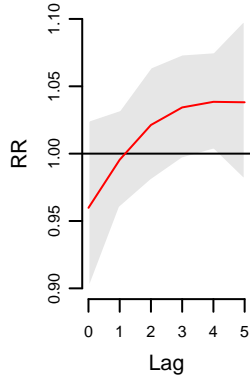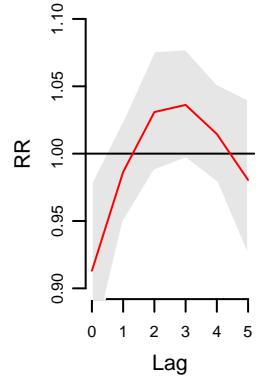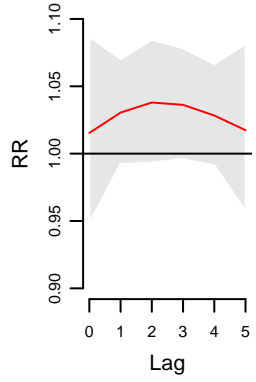

Entire year

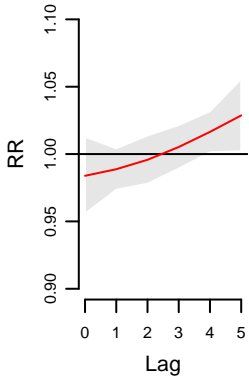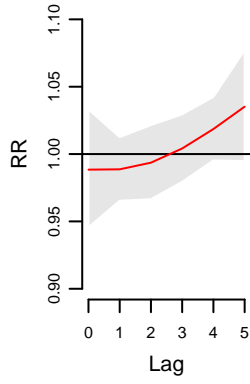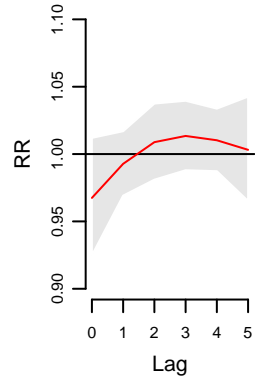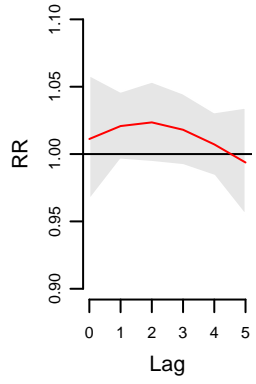

Lag day

Supplement: mmc4.pdf [file mmc4.pdf]

O3, 1h max

O3, 8h max

O3, 24h avg

Ox

Hot season

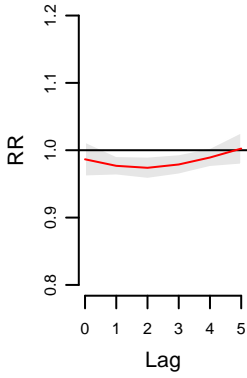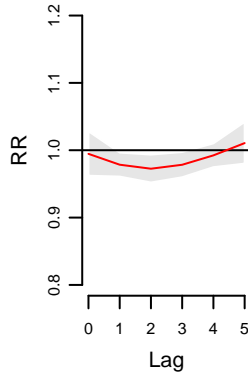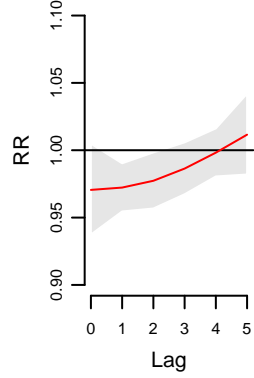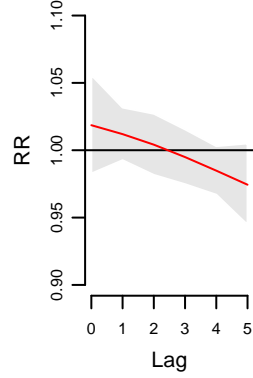

Cold season

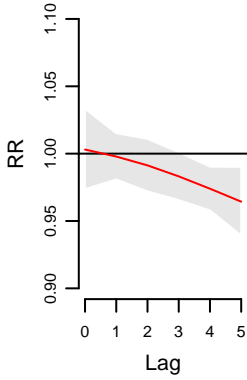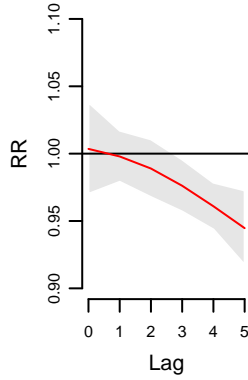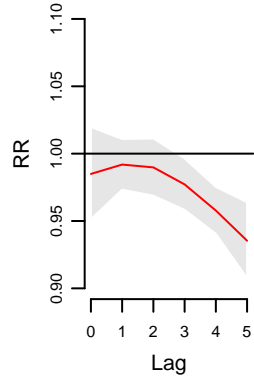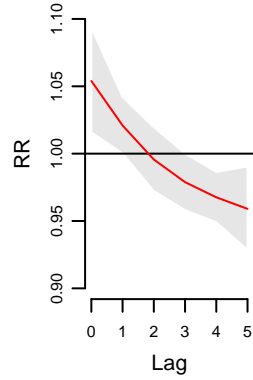

Entire year

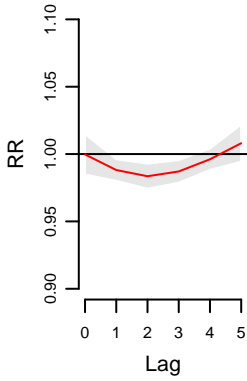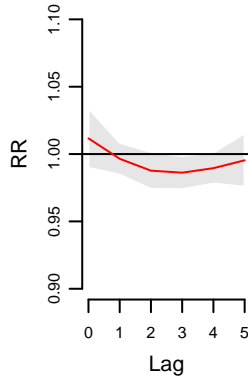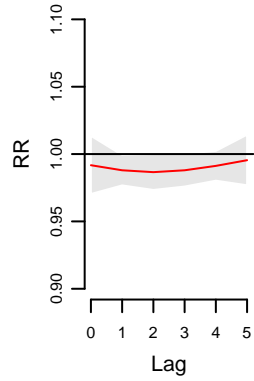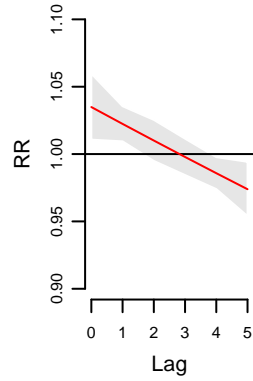

Lag day

Supplement: mmc5.pdf [file mmc5.pdf]
